# Supplementary material
Source: Springer Nature journal article supplement (https://www.springermedizin.de/resource/supplementary/13195_2014_223_MOESM3_ESM.pdf/9688510)

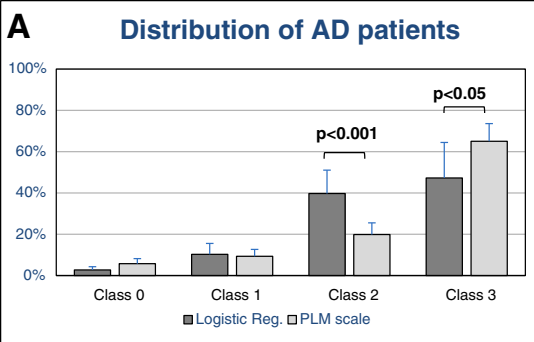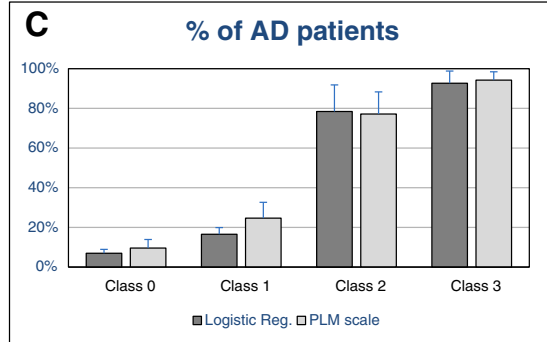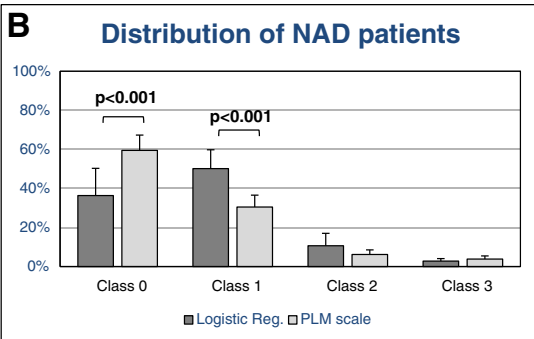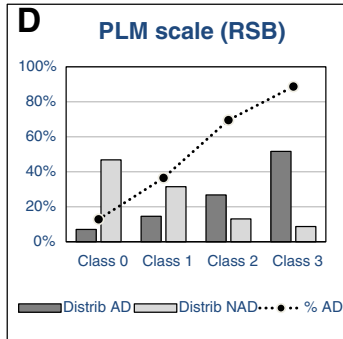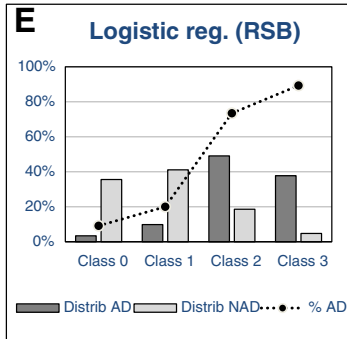

Supplement: MOESM3 [file 9688510]
